# Supplementary material for: Crystals of 4,7-Di-2-thienyl-2,1,3-benzothiadiazole and Its Derivative with Terminal Trimethylsilyl Substituents: Synthesis, Growth, Structure, and Optical-Fluorescent Properties
Source: MDPI journal article supplement (doi:10.3390/cryst13121697), 2023-12-18
Supplement: s1 [file s1]

## Supporting Information

### Crystals of 4,7-di-2-thienyl-2,1,3-benzothiadiazole and Its Derivative with Terminal Trimethylsilyl Substituents: Synthesis, Growth, Structure and Optical-Fluorescent Properties

Valery A. Postnikov<sup>1,2\*</sup>, Georgy A. Yurasik<sup>1,2</sup>, Artem A. Kulishov<sup>1,2</sup>, Timofei A. Sorokin<sup>1,2</sup>, Maria S. Lyasnikova<sup>1</sup>, Nataliya I. Sorokina<sup>1</sup>, Maxim S. Skorotetcky<sup>2</sup>, Vlada V. Popova<sup>2</sup>, Lev L. Levkov<sup>2</sup>, Oleg V. Borshchev<sup>2</sup>, Evgeniya A. Svidchenko<sup>2</sup>, Nikolay M. Surin<sup>2</sup> and Sergey A. Ponomarenko<sup>2\*</sup>

<sup>1</sup> FSRC “Crystallography and Photonics” of Russian Academy of Sciences, Shubnikov Institute of Crystallography, Moscow 119333, Russia;

<sup>2</sup> Enikolopov Institute of Synthetic Polymer Materials of Russian Academy of Sciences, Moscow 117393, Russia

#### 1. DSC

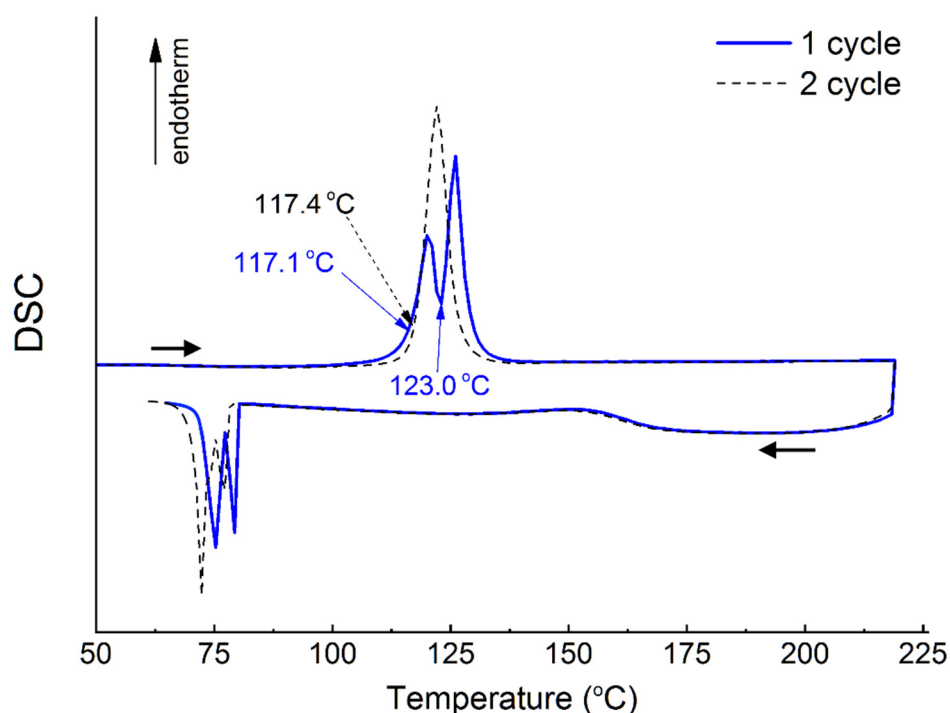

**Figure S1.** DSC curves characterizing the melting and crystallization of T-BDT sample in two consecutive heating and cooling cycles.

## 2. Crystal growth

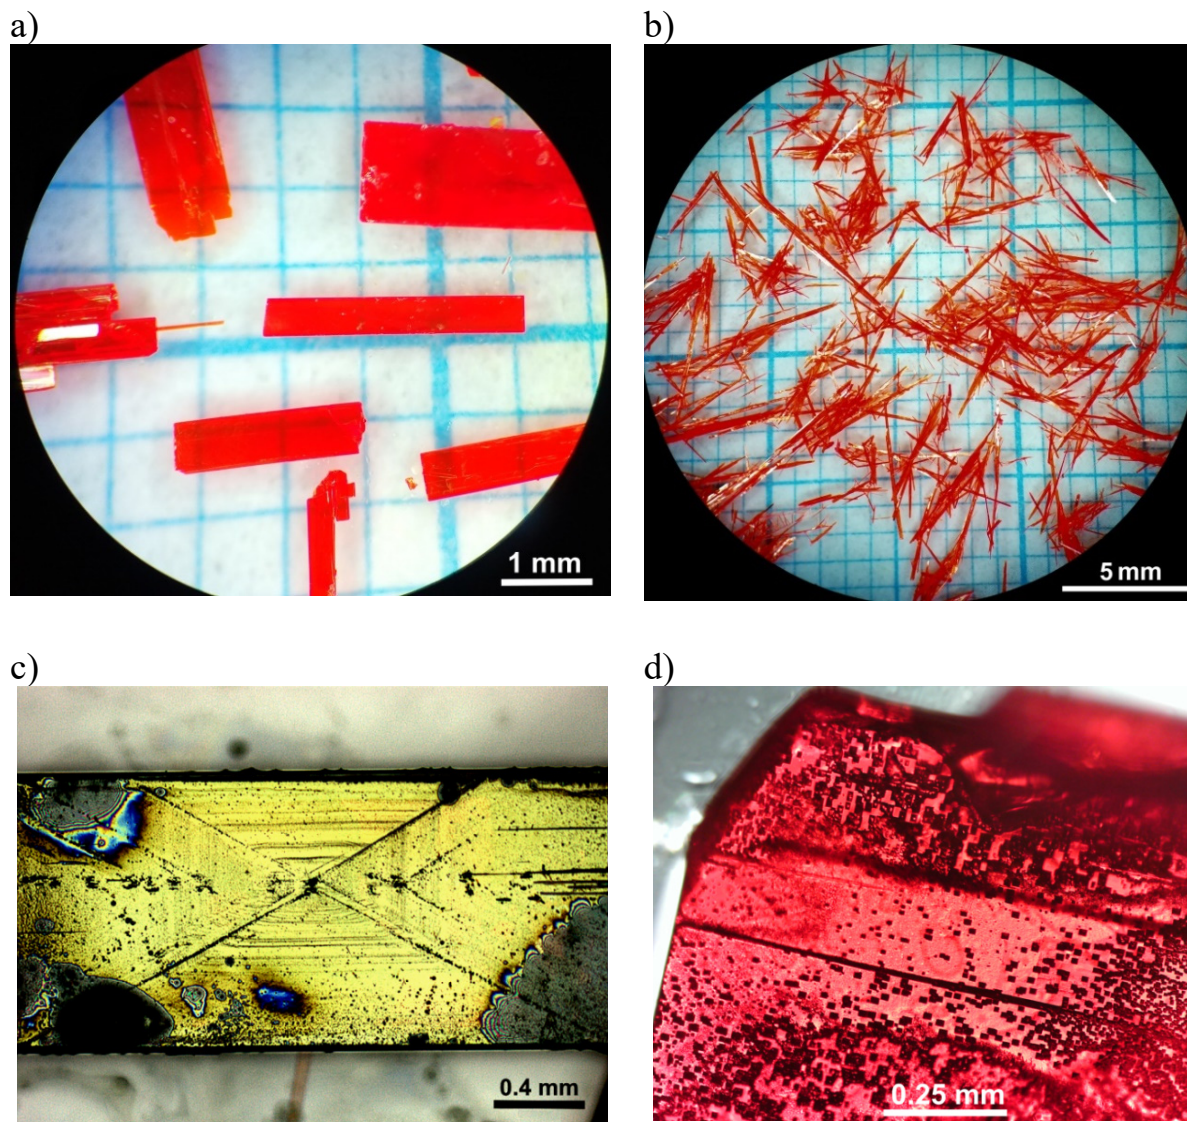

**Figure S2.** Crystals of T-BTD: (a) crystals grown from a solution in hexane with a small addition of THF (growth period 30 days); (b) crystals grown from a solution in acetone (growth period 7 days); (c), (d) images of the surface of the developed face of crystals grown from solution in hexane.

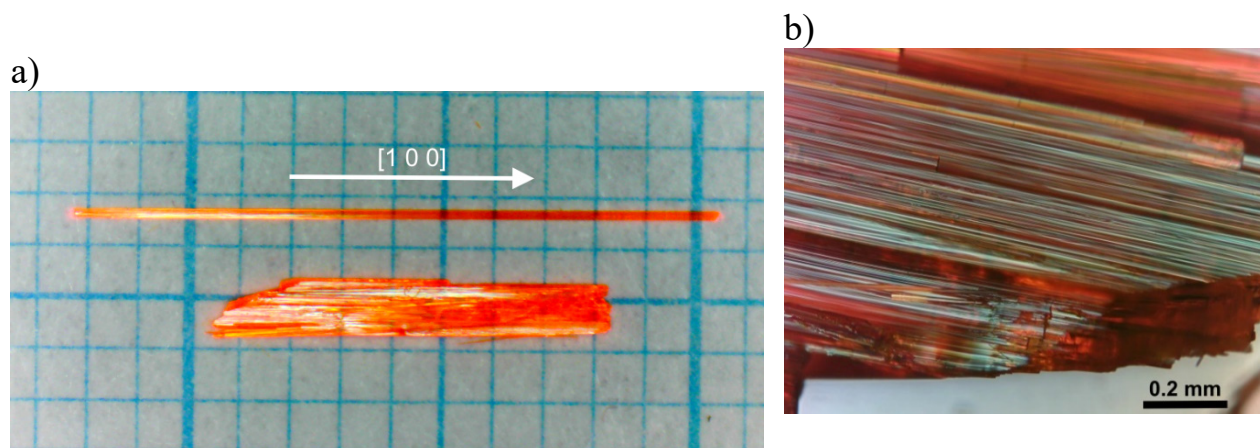

**Figure S3.** Crystals of TMS-T-BTD grown from a hexane solution (a) and enlarged image of the bottom crystal surface (b).

### 3. Crystal structure

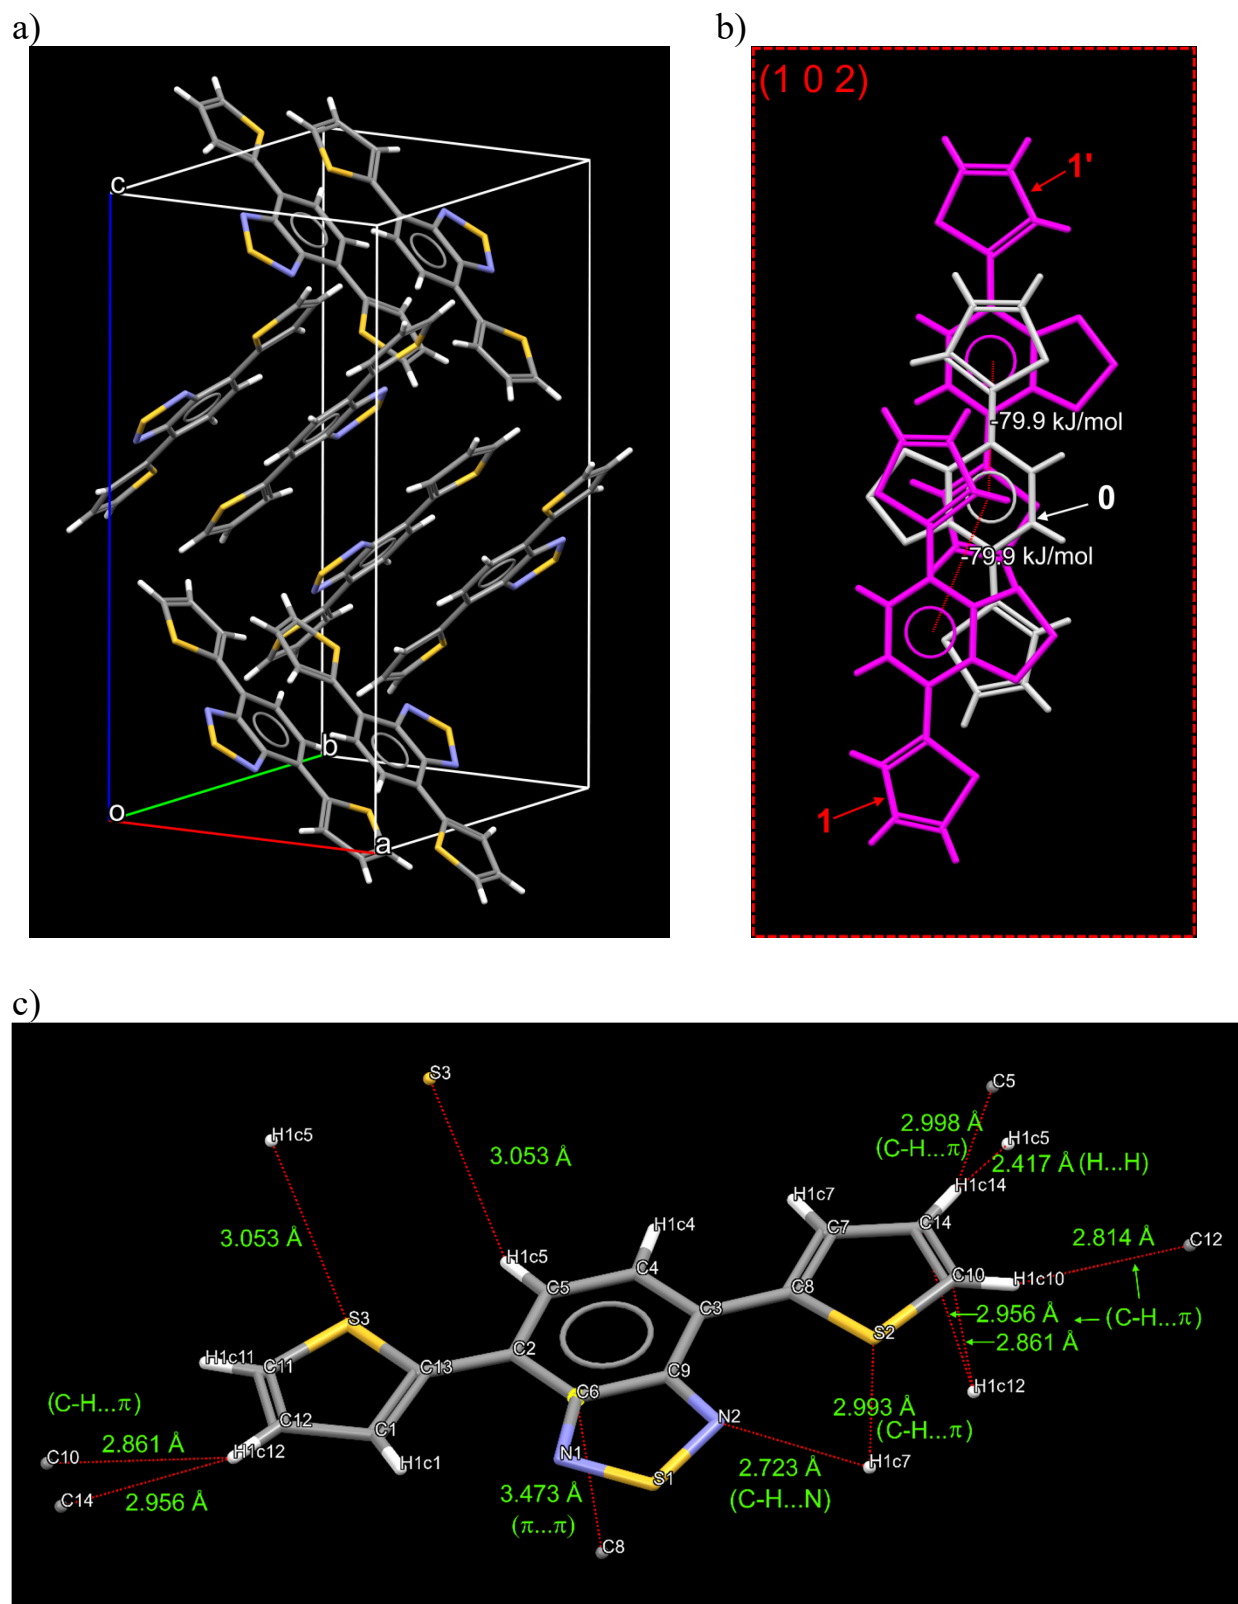

**Figure S4.** Crystal structure of T-BTD at 293 K: (a) View of unit cell; (b) projection of three neighboring molecules from a close-packed row [1 0 0] onto the (1 0 2) plane; (c) scheme of shortest contacts of a molecule with atoms of nearest neighbours.



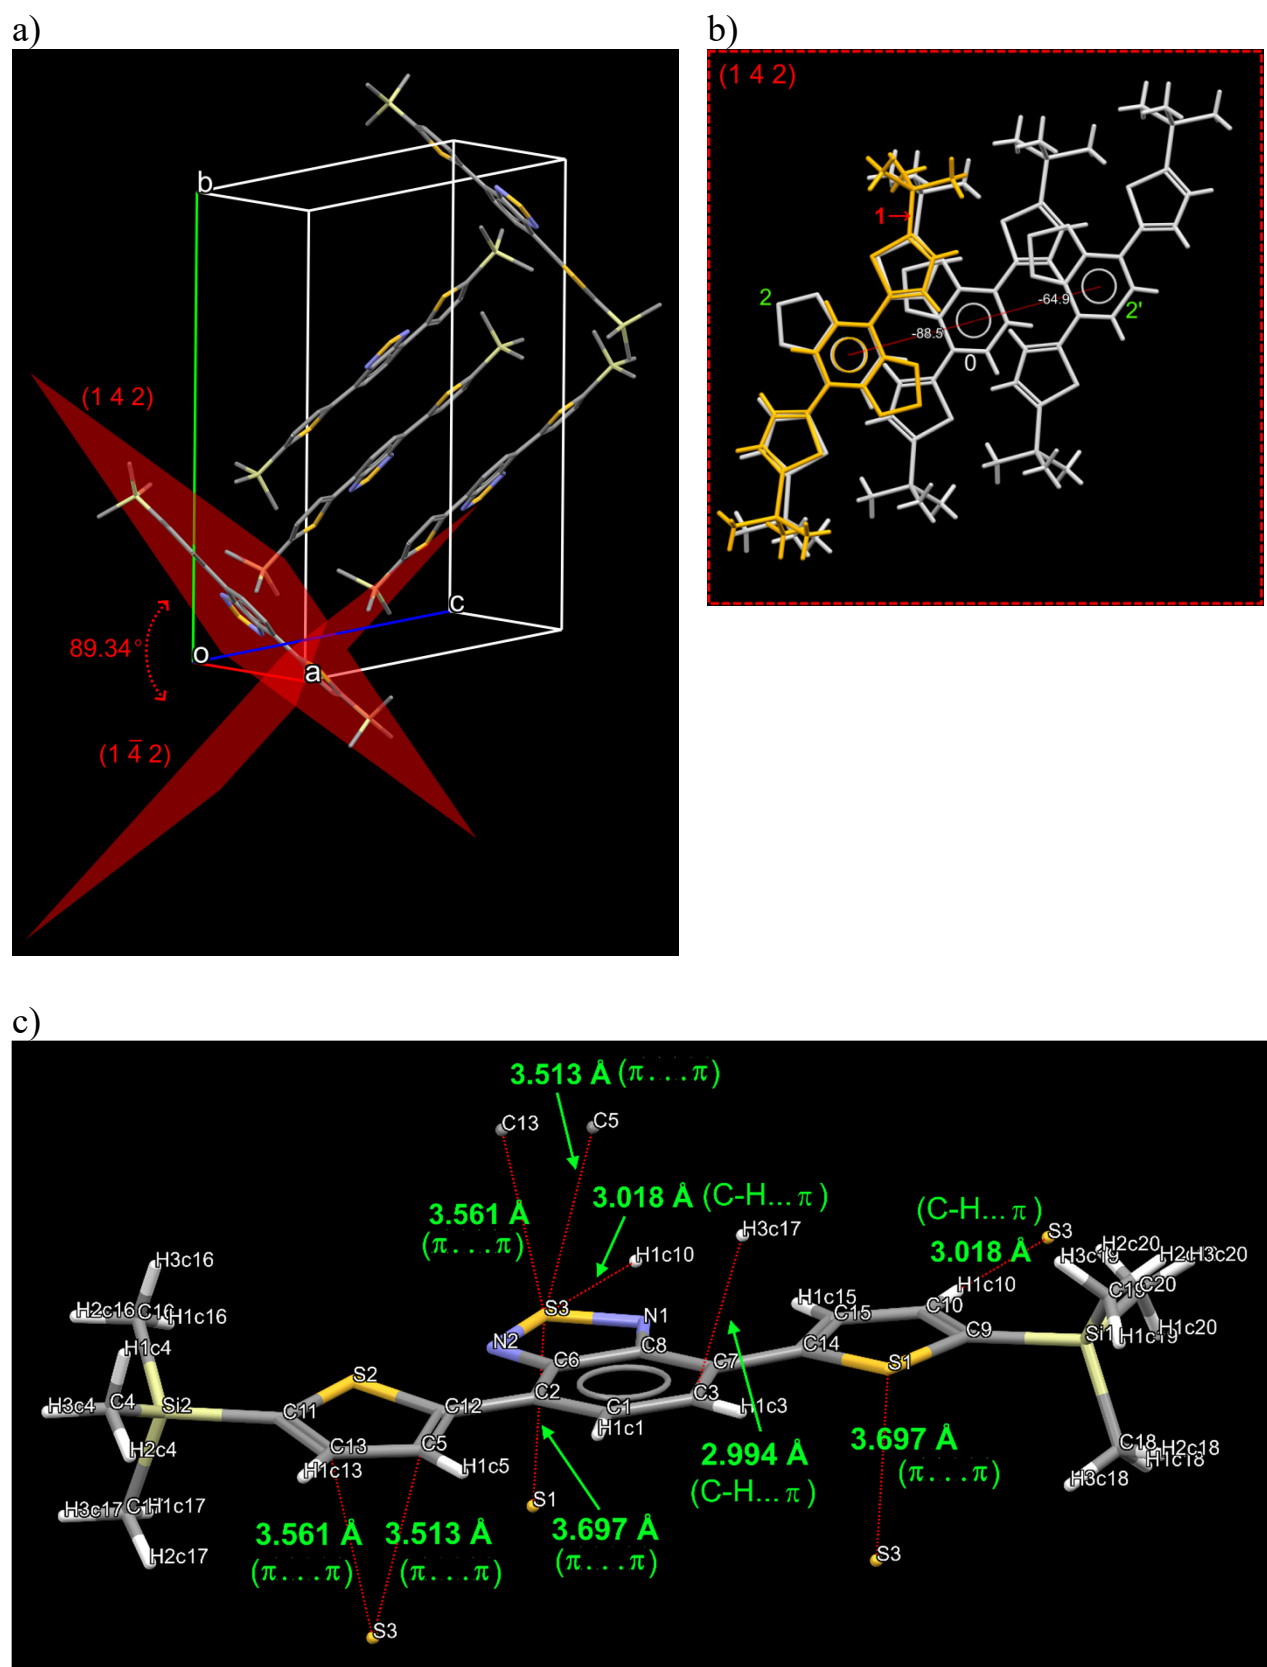

**Figure S5.** Crystal structure of TMS-T-BTD at 293 K: (a) View of unit cell; (b) projection of for neighboring molecules onto the (1 4 2) plane; (c) scheme of shortest contacts of a molecule with atoms of nearest neighbours.

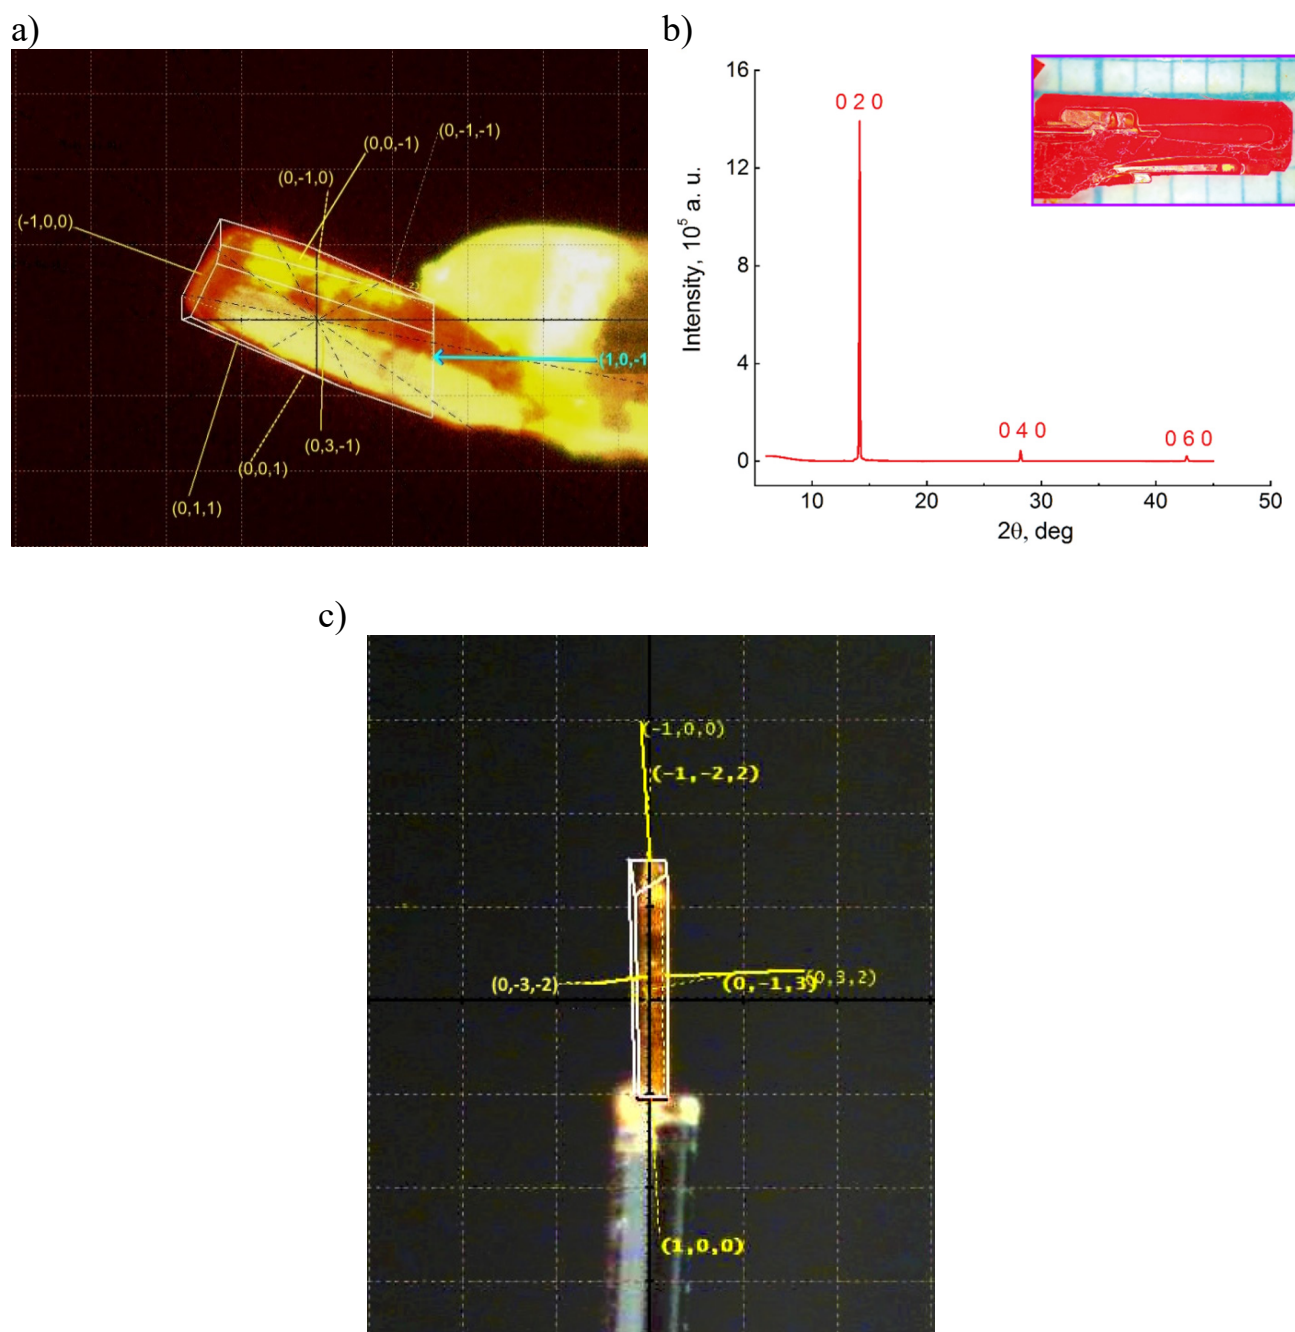

**Figure S6.** (a) Photographic image of T-BTD single crystal with face indices determined in the X-ray diffraction experiment; (b) XRD pattern obtained by reflection from a developed face of a flat T-BTD crystal (photo in the insert); (c) Photographic image of TMS-T-BTD single crystal with face indices determined in the X-ray diffraction experiment.

## 4. Absorption and fluorescent properties

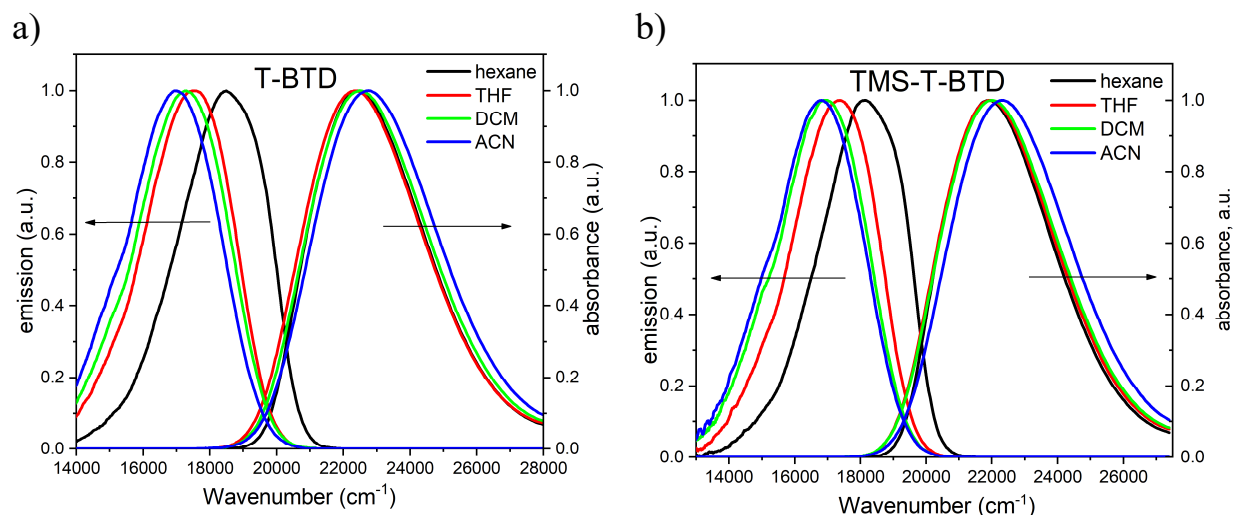

**Figure S7.** Normalized absorption (right axis) and fluorescence (left axis) spectra of solutions of T-BTD (a) and TMS-T-BTD (b) in hexane, THF, dichloromethane (DCM), and acetonitrile (ACN). Excitation was carried out at the maximum of the long-wave absorption band.

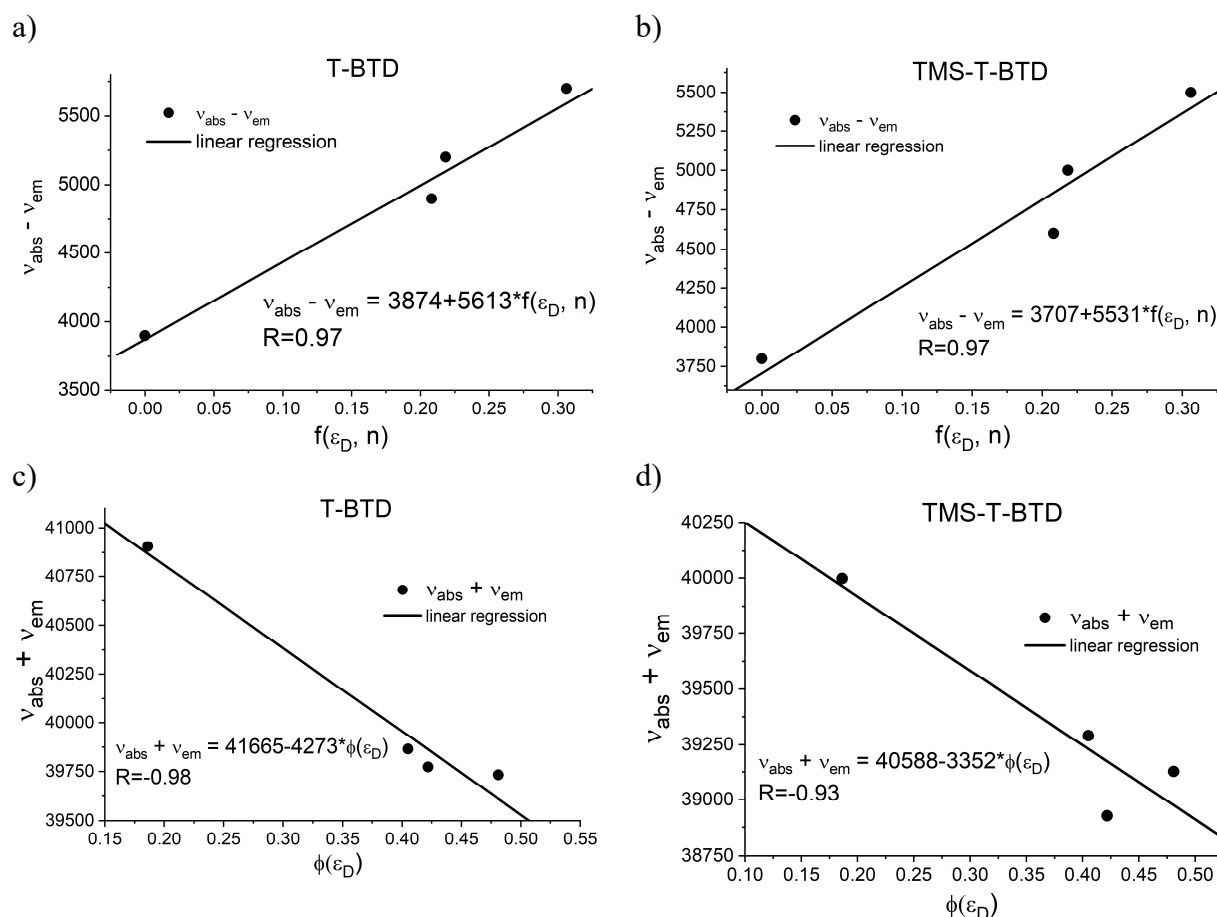

**Figure S8.** To the calculation of the dipole moments of T-BTD (a, c) and TMS-T-BTD (b, d) molecules: dependence of the difference (a, b) and sum (c, d) of the absorption and fluorescence band maxima on the solvent functions  $f(\epsilon_D, n)$  and  $\phi(\epsilon_D)$ . The points are experimental data, the lines are linear regression (the equations of dependencies and the linear regression coefficient are given).

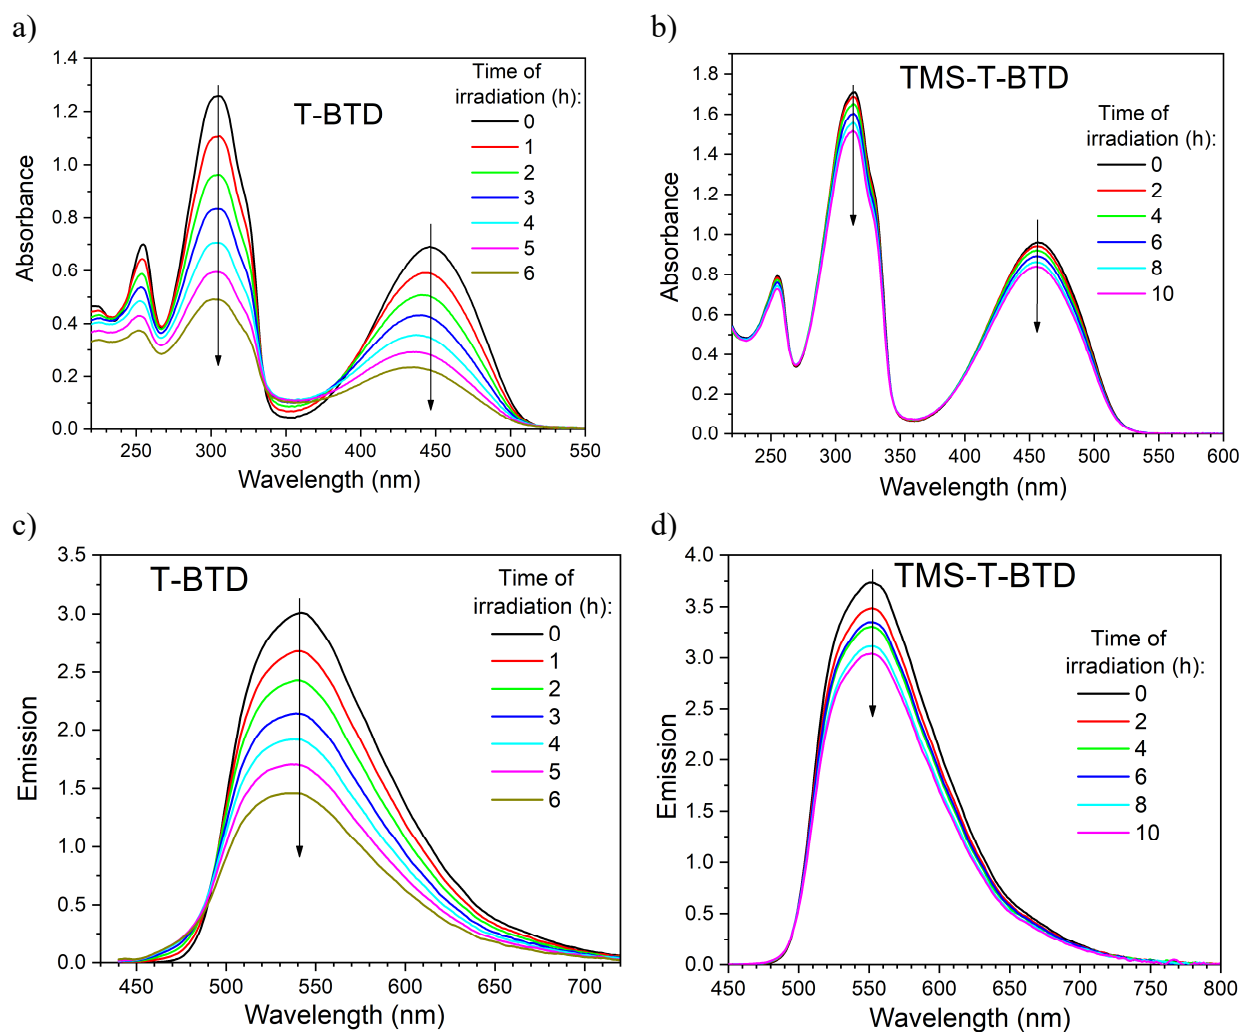

**Figure S9.** Changes in the absorption (a, b) and fluorescence (c, d) spectra of solutions of T-BTD (a, c) and TMS-T-BTD (b, d) in hexane upon irradiation. The initial concentration was  $5 \cdot 10^{-5}$  mol/L, the cuvette thickness was 1 cm. Excitation was carried out with light with a wavelength of 446 nm (T-BTD) and 457 nm (TMS-T-BTD).

**Table S1.** Photoirradiation of T-BTD and TMS-T-BTD solutions in hexane.

| Compound  | Initial concentration (mol/L) | Lamp intensity (mol/(L*s)) | Irradiation time (h) | Average absorbed light intensity (mol/(L*s)) | Quantum yield of photodestruction |
|-----------|-------------------------------|----------------------------|----------------------|----------------------------------------------|-----------------------------------|
|           | $C_0$                         |                            | $t$                  | $I_{abs}^{mean}$                             | $QY_{PhD}$                        |
| T-BTD     | $5 \cdot 10^{-5}$             | $5.88 \cdot 10^{-5}$       | 6                    | $4.21 \cdot 10^{-5}$                         | $4.07 \cdot 10^{-5}$              |
| TMS-T-BTD | $5 \cdot 10^{-5}$             | $5.88 \cdot 10^{-5}$       | 10                   | $5.88 \cdot 10^{-5}$                         | $2.99 \cdot 10^{-6}$              |

Notes. The average intensity of absorbed light ( $I_{abs}^{mean}$ ) corresponds to the absorption of the system at an average irradiation time. The quantum yield of photodestruction  $QY_{PhD}$  was calculated as the ratio of the amount of decayed substance during the irradiation to the intensity of the absorbed light during this time, i.e.

$$QY_{PhD} = \frac{C_0 - C_t}{t \times I_{abs}^{mean}}.$$

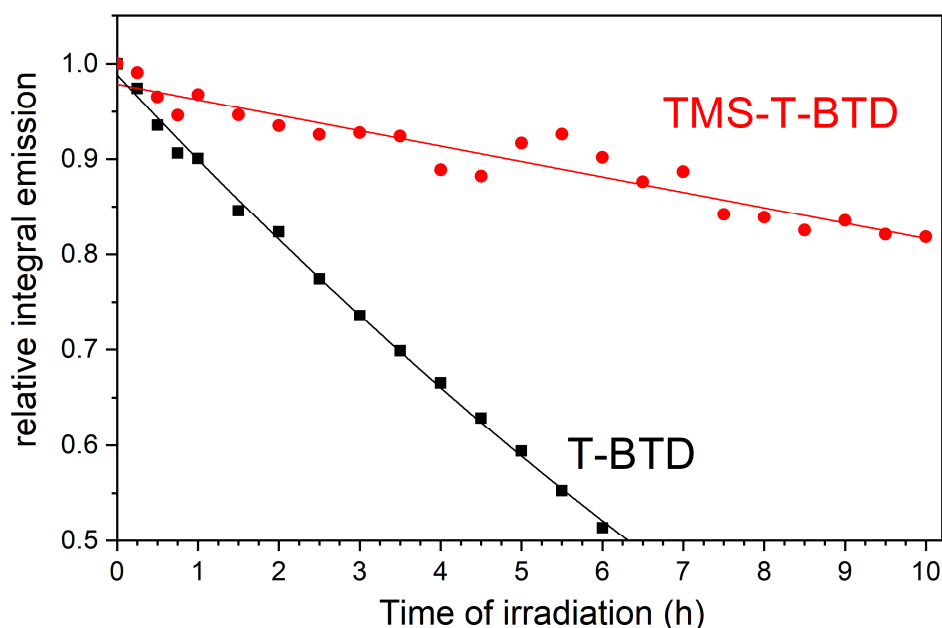

**Figure S10.** Change in the relative integral fluorescence of solutions of T-BTD and TMS-T-BTD in hexane upon irradiation. Points – experimental data, lines – approximation. Excitation was carried out with the light at wavelengths of 446 nm (T-BTD) and 457 nm (TMS-T-BTD).
